# Supplementary material
Source: PubMed Central journal article supplement (PMC6475989)
Supplement: Supplemental_material1.pdf [file Supplemental_material1.pdf]

## Appendix 1. Search Strategy

Database: Ovid MEDLINE®

1946 to March, 2018

- 1 critically\$.tw. or exp Critical Care/ or intensive care units/ or ((critical\$ or intensive) adj care).mp. (264548)
- 2 (intensive care unit\$ or ICU).mp. (135372)
- 3 or/1-2 (273057)
- 4 exp Respiration, Artificial/ or exp Ventilators, Mechanical/ (76687)
- 5 (ventilat\$ adj2 (artificial\$ or mechanical\$)).tw. (49481)
- 6 (respirat\$ adj2 (artificial\$ or assisted\$ or mechanical\$)).tw. (2995)
- 7 (respirat\$ adj2 failure\$).tw. (27416)
- 8 (ventilat\$ adj3 patient\$).mp. or (ventilat\$ and patient\$).ti. or (ventilat\$ and patient\$).ab. /freq=3 (32746)
- 9 (PPV and (pressure or ventilat\*)).tw. (1020)
- 10 (positive adj3 pressure adj5 (ventilat\$ or respir\$)).tw. (8930)
- 11 or/4-10 [ventilated patients search concept] (133378)
- 12 3 or 11 (373355)
- 13 Patient Discharge/ (25204)
- 14 ((plann\$ or instruction\$) adj5 discharg\$).mp. (4312)
- 15 ((individuali?ed\$ adj3 plan\$) and discharg\$).mp. (101)
- 16 ((plan\$ or instruction\$) adj3 discharg\$).mp. (4959)
- 17 (patient\$ adj3 discharg\$).mp. (58117)
- 18 (discharg\$ adj5 hospital\$).mp. (48687)
- 19 (discharg\$ adj5 (home\$1 or (nursing\$ adj2 home\$))).mp. (10975)
- 20 (post-discharg\$ or postdischarg\$).mp. or discharg\$.ti. or discharg\$.ab. /freq=2 (85731)
- 21 or/13-20 (142905)
- 22 12 and 21 (12783)
- 23 22 not (mice or rat or rats or cat\$1 or cattle\$1 or dog\$1 or goat\$1 or horse\$1 or rabbit\$1 or sheep\$1 or swine\$1 or pig\$1 or canine\$1 or porcine\$ or calf).ti. (12535)
- 24 limit 23 to english language (11495)
- 25 limit 24 to "all adult (19 plus years)" (6227)
- 26 limit 24 to "all child (0 to 18 years)" (3744)
- 27 24 not (26 not (25 and 26)) (9089)
- 28 (pediatr\$ or paediatr\$ or child\$ or adolescent\$ or infan\$ or newborn\$ or neonat\$).ti. (1237109)
- 29 27 not 28 (8394)
- 30 case report/ or Case report\$.mp. (2024845)
- 31 **29 not 30 (7540)**
